# Supplementary material for: Structures and electronic states of trimer radical cations of coronene: DFT–ESR simulation study
Source: Royal Society of Chemistry journal article supplement (doi:10.1039/d1cp04638a), 2022-01-01
Supplement: d1cp04638a1.pdf [file d1cp04638a1.pdf]

## Supporting Information

Table S1. Hyperfine coupling constants of the coronene radical cation ( $a(\text{H})$  in Gauss units,  $1 \text{ G} = 0.1 \text{ mT}$ ). Calculations were carried out at the CAM-B3LYP/6-311G(d,p) level. Notation “f” means a scaling factor to fit the experimental value (0.156 mT): ( $f=1.092$ )

| ${}^2\text{A}_u (\text{D}_{2h})$ |      |               |                   | ${}^2\text{B}_{3u} (\text{D}_{2h})$ |      |               |                   |
|----------------------------------|------|---------------|-------------------|-------------------------------------|------|---------------|-------------------|
| Atom                             |      | $a(\text{H})$ | $a(\text{H}) * f$ | Atom                                |      | $a(\text{H})$ | $a(\text{H}) * f$ |
| 17                               | H(1) | -0.567        | -0.619            | 17                                  | H(1) | -2.242        | -2.448            |
| 18                               | H(1) | -0.567        | -0.619            | 18                                  | H(1) | -2.242        | -2.448            |
| 19                               | H(1) | -4.712        | -5.145            | 19                                  | H(1) | 1.848         | 2.018             |
| 20                               | H(1) | 0.992         | 1.084             | 20                                  | H(1) | -3.881        | -4.238            |
| 21                               | H(1) | -4.712        | -5.145            | 21                                  | H(1) | 1.848         | 2.018             |
| 22                               | H(1) | 0.992         | 1.084             | 22                                  | H(1) | -3.881        | -4.238            |
| 26                               | H(1) | -4.712        | -5.145            | 26                                  | H(1) | 1.848         | 2.018             |
| 27                               | H(1) | 0.992         | 1.084             | 27                                  | H(1) | -3.881        | -4.238            |
| 31                               | H(1) | -0.567        | -0.619            | 31                                  | H(1) | -2.242        | -2.448            |
| 32                               | H(1) | -0.567        | -0.619            | 32                                  | H(1) | -2.242        | -2.448            |
| 34                               | H(1) | -4.712        | -5.145            | 34                                  | H(1) | 1.848         | 2.018             |
| 36                               | H(1) | 0.992         | 1.084             | 36                                  | H(1) | -3.881        | -4.238            |
| < $a(\text{H})$ >=               |      | -1.429        | -1.560            | < $a(\text{H})$ >=                  |      | -1.425        | -1.556            |

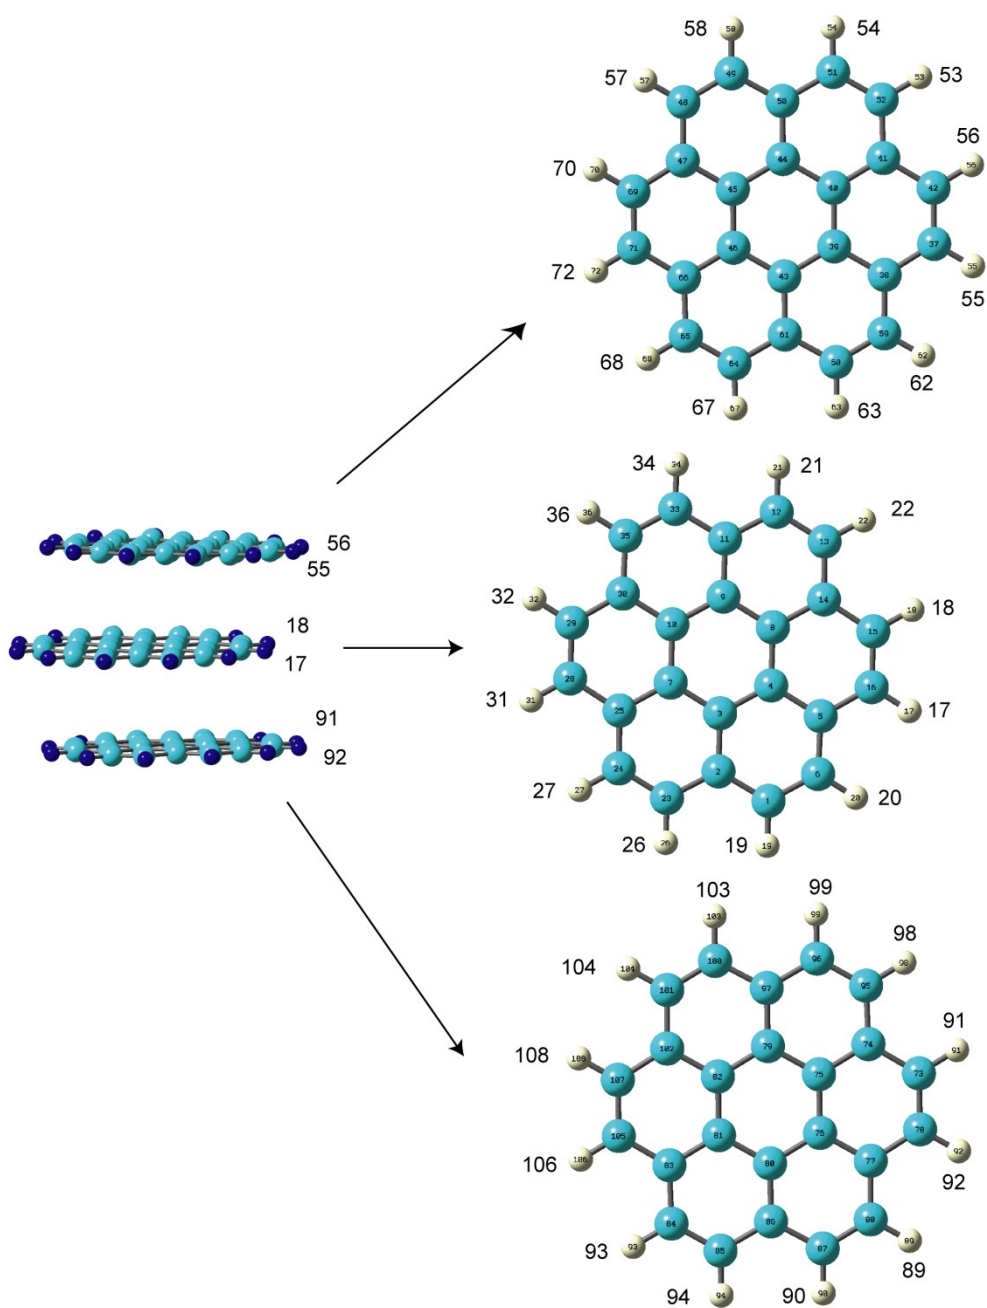

Figure S1. Numbering of the protons in the trimer cation of coronene (See Table 1).

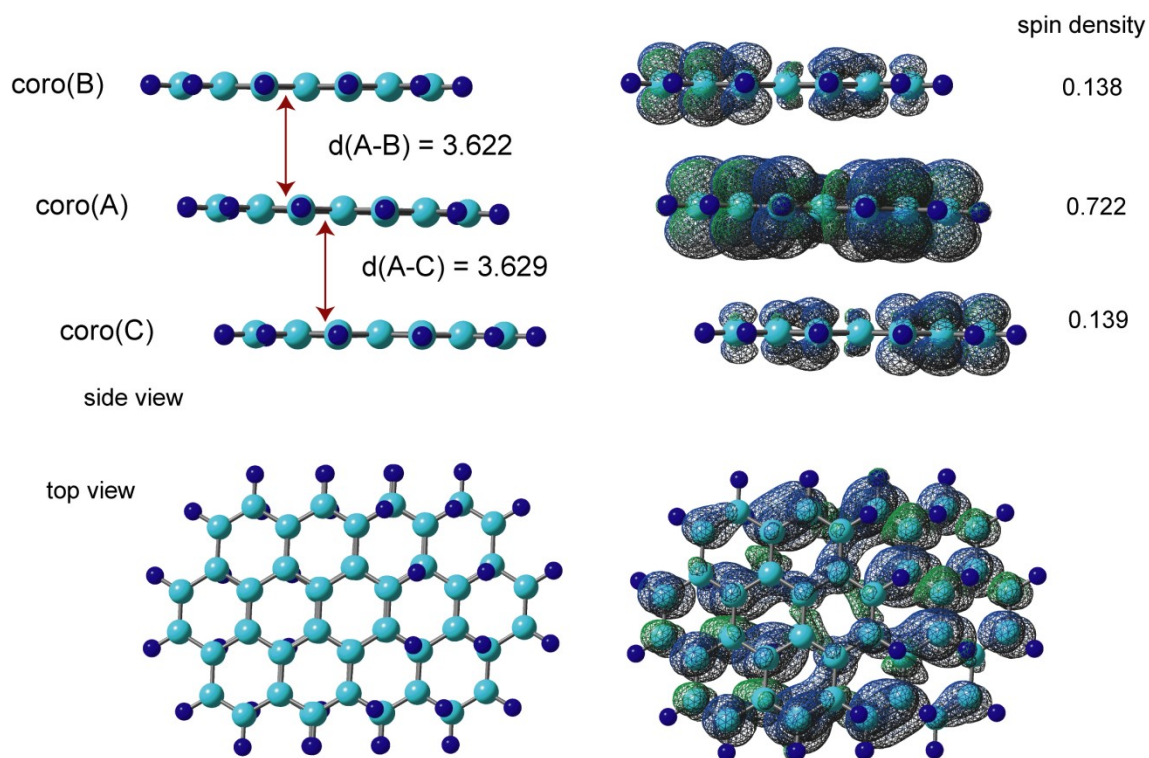

Figure S2. Optimized structures and values of the spin density in each plane of the trimer cation of coronene (*ABC* stacking form). Interplane distances,  $d(A-B)$  and  $d(A-C)$ , are in Å. Calculations were carried out at the CAM-B3LYP/6-311G(d,p) level.

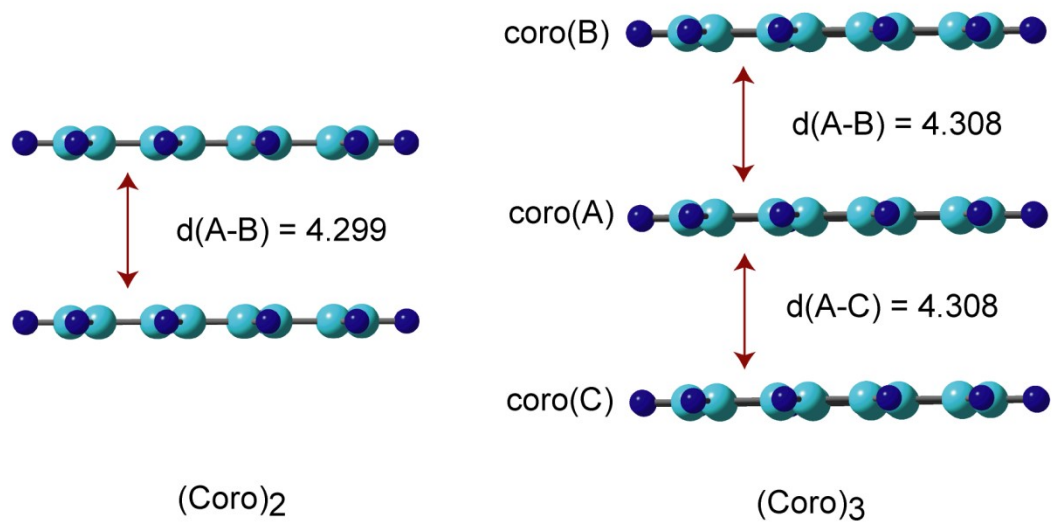

Figure S3. Optimized structures of neutral coronene dimer and trimer calculated at the CAM-B3LYP/6-311G(d,p) level. Interplane distances,  $d(\text{A-B})$  and  $d(\text{A-C})$ , are in Å.

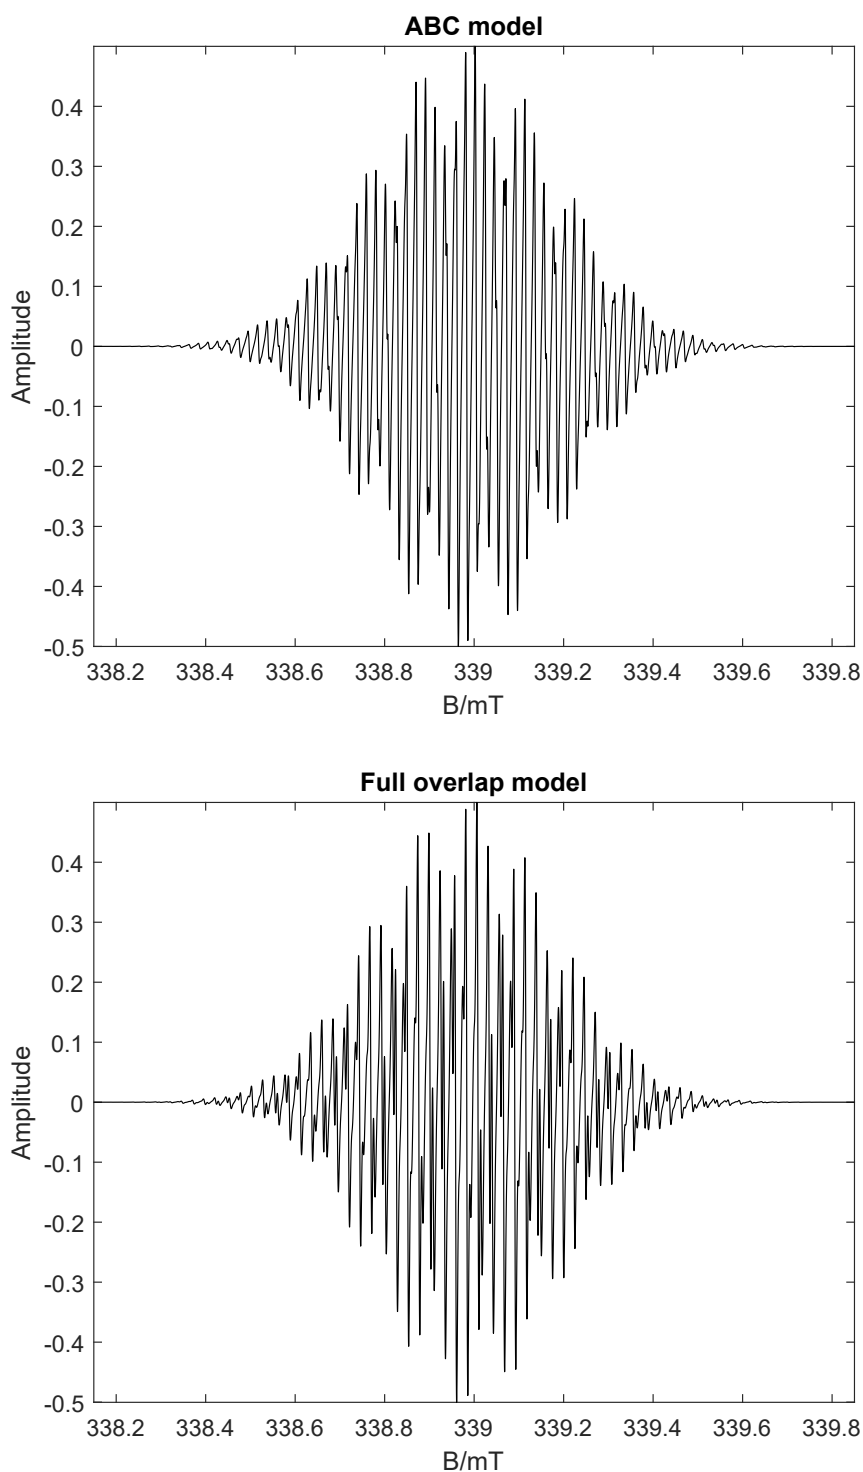

Figure S4. Simulated ESR spectra of the coronene trimer radical cation for the ABC and full overlapped forms using the hfcc's calculated at the CAM-B3LYP/6-311G(d,p) level (multiplied by  $f = 1.092$ ).

Table S2. Hyperfine coupling constants of the dimer radical cation of coronene (a(H) in Gauss units, 1 G = 0.1 mT). Calculations were carried out at the CAM-B3LY P/6-311G(d,p) level. Notation “f” means a scaling factor to fit the experimental value of the coronene cation radical (0.156 mT,): (f=1.092).

|  | Atom    | a(H)   | a(H)*f |
|--|---------|--------|--------|
|  | 17 H(1) | -1.500 | -1.637 |
|  | 18 H(1) | 0.640  | 0.699  |
|  | 19 H(1) | -1.393 | -1.521 |
|  | 20 H(1) | -0.749 | -0.818 |
|  | 21 H(1) | -1.529 | -1.670 |
|  | 22 H(1) | 0.651  | 0.711  |
|  | 26 H(1) | -2.399 | -2.620 |
|  | 27 H(1) | 1.170  | 1.278  |
|  | 31 H(1) | 1.160  | 1.266  |
|  | 32 H(1) | -2.371 | -2.589 |
|  | 34 H(1) | -0.790 | -0.863 |
|  | 36 H(1) | -1.358 | -1.483 |
|  | 53 H(1) | 1.170  | 1.277  |
|  | 54 H(1) | -2.397 | -2.618 |
|  | 55 H(1) | -2.376 | -2.595 |
|  | 56 H(1) | 1.162  | 1.269  |
|  | 57 H(1) | -0.757 | -0.827 |
|  | 58 H(1) | -1.391 | -1.519 |
|  | 62 H(1) | -1.367 | -1.493 |
|  | 63 H(1) | -0.783 | -0.855 |
|  | 67 H(1) | -1.526 | -1.666 |
|  | 68 H(1) | 0.650  | 0.710  |
|  | 70 H(1) | -1.508 | -1.647 |
|  | 72 H(1) | 0.644  | 0.703  |
|  | <a(H)>= | -0.706 | -0.771 |

Table S3. Hyperfine coupling constants of the trimer radical cation of coronene ( $a(\text{H})$  in Gauss units,  $1 \text{ G} = 0.1 \text{ mT}$ ). Calculations were carried out at the CAM-B3LYP/6-311G(d,p) level. Notation “f” means a scaling factor to fit the experimental value of the coronene cation radical ( $0.156 \text{ mT}$ ): ( $f=1.092$ ). Red values indicate hyperfine coupling constants close to zero.

| Atom    | $a(\text{H})$ | $a(\text{H}) * f$ |
|---------|---------------|-------------------|
| 17 H(1) | -0.363        | -0.397            |
| 18 H(1) | -0.344        | -0.376            |
| 19 H(1) | -3.679        | -4.018            |
| 20 H(1) | 0.850         | 0.929             |
| 21 H(1) | -3.682        | -4.020            |
| 22 H(1) | 0.862         | 0.941             |
| 26 H(1) | -3.450        | -3.768            |
| 27 H(1) | 0.741         | 0.810             |
| 31 H(1) | -0.515        | -0.562            |
| 32 H(1) | -0.546        | -0.596            |
| 34 H(1) | -3.439        | -3.755            |
| 36 H(1) | 0.718         | 0.784             |
| 53 H(1) | 0.380         | 0.415             |
| 54 H(1) | -0.792        | -0.865            |
| 55 H(1) | -0.672        | -0.734            |
| 56 H(1) | 0.356         | 0.389             |
| 57 H(1) | -0.115        | -0.125            |
| 58 H(1) | -0.333        | -0.364            |
| 62 H(1) | -0.426        | -0.465            |
| 63 H(1) | -0.042        | -0.045            |
| 67 H(1) | -0.157        | -0.171            |
| 68 H(1) | 0.034         | 0.037             |
| 70 H(1) | -0.309        | -0.337            |
| 72 H(1) | 0.067         | 0.073             |
| 89 H(1) | 0.381         | 0.416             |
| 90 H(1) | -0.795        | -0.868            |

|         |      |        |        |
|---------|------|--------|--------|
| 91      | H(1) | -0.669 | -0.731 |
| 92      | H(1) | 0.355  | 0.387  |
| 93      | H(1) | -0.110 | -0.120 |
| 94      | H(1) | -0.337 | -0.368 |
| 98      | H(1) | -0.424 | -0.463 |
| 99      | H(1) | -0.048 | -0.052 |
| 103     | H(1) | -0.161 | -0.175 |
| 104     | H(1) | 0.037  | 0.040  |
| 106     | H(1) | -0.307 | -0.335 |
| 108     | H(1) | 0.067  | 0.074  |
| <hr/>   |      |        |        |
| <a(H)>= |      | -0.468 | -0.512 |

Table S4. Hyperfine coupling constants of each layer in the trimer radical cation of coronene,  $(\text{Coro})_3^+$  (in Gauss units, 1 G=0.1 mT) calculated at the CAM-B3LYP/6-311G(d,p) level. Numbering of protons is given in Figure S1.

| coro(A)             |      | coro(B) |      | coro(C) |         |         |      |         |
|---------------------|------|---------|------|---------|---------|---------|------|---------|
| atom                | a(H) | atom    | a(H) | atom    | a(H)    |         |      |         |
| 17                  | H(1) | -2.3233 | 53   | H(1)    | 0.4262  | 89      | H(1) | -0.4717 |
| 18                  | H(1) | 1.0224  | 54   | H(1)    | -0.8447 | 90      | H(1) | -0.0738 |
| 19                  | H(1) | -2.0183 | 55   | H(1)    | -0.8458 | 91      | H(1) | 0.4267  |
| 20                  | H(1) | -1.0782 | 56   | H(1)    | 0.4266  | 92      | H(1) | -0.8460 |
| 21                  | H(1) | -2.3271 | 57   | H(1)    | -0.0748 | 93      | H(1) | 0.0740  |
| 22                  | H(1) | 1.0237  | 58   | H(1)    | -0.4702 | 94      | H(1) | -0.2804 |
| 26                  | H(1) | -3.3493 | 62   | H(1)    | -0.4719 | 98      | H(1) | 0.4266  |
| 27                  | H(1) | 1.6345  | 63   | H(1)    | -0.0730 | 99      | H(1) | -0.8456 |
| 31                  | H(1) | 1.6334  | 67   | H(1)    | -0.2796 | 103     | H(1) | -0.4709 |
| 32                  | H(1) | -3.3467 | 68   | H(1)    | 0.0737  | 104     | H(1) | -0.0749 |
| 34                  | H(1) | -1.0819 | 70   | H(1)    | -0.2813 | 106     | H(1) | 0.0743  |
| 36                  | H(1) | -2.0140 | 72   | H(1)    | 0.0742  | 108     | H(1) | -0.2814 |
| <b>average (G)</b>  |      | -1.0187 |      | -0.1951 |         | -0.1952 |      |         |
| <b>average (mT)</b> |      | -0.1019 |      | -0.0195 |         | -0.0195 |      |         |
| <b>scaled (mT)</b>  |      | -0.1112 |      | -0.0213 |         | -0.0213 |      |         |



Table S5. Optimized geometrical parameters of the benzene dimer cation calculated using several functionals. Bond lengths ( $R$ ) and angles ( $\theta$ ) are in Å and in degrees, respectively.  $d(\text{A-B})$  is the interplane distance of the benzene dimer cation,  $E_{\text{bind}}$  is the binding energy (in kcal/mol). Calculations were carried out using the 6-311G(d,p) basis set.

| functional       | $R$   | $\theta$ | $d(\text{A-B})$ | $E_{\text{bind}}$ |
|------------------|-------|----------|-----------------|-------------------|
| <b>CAM-B3LYP</b> | 3.359 | 71.957   | 3.194           | 15.61             |
| <b>wB97XD</b>    | 3.283 | 71.959   | 3.122           | 22.59             |
| <b>LC-wB97XD</b> | 3.284 | 71.916   | 3.122           | 22.61             |
| <b>M062X</b>     | 3.271 | 70.139   | 3.077           | 21.40             |
| <b>wB97X</b>     | 3.292 | 71.790   | 3.127           | 17.05             |
| <b>B3LYP</b>     | 3.502 | 73.320   | 3.354           | 18.66             |

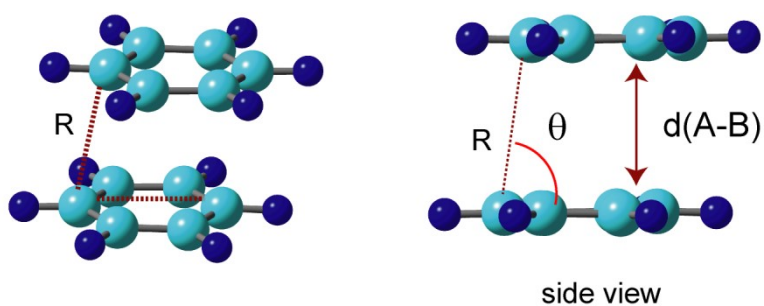

Table S6. Effects of functionals on the ionization potential of coronene (Ip in eV) and Jahn-Teller stabilization energies of the coronene radical cation from vertical ionization point to  $\text{coro}^+$  ( ${}^2\text{Au}$  state) ( $\Delta\text{E}(\text{J-T})$  in kcal/mol). Total energies are in a.u.

|                  | <b>coro(0)</b> | <b>VER</b> | <b>coro<sup>+</sup>(<sup>2</sup>Au)</b> | <b>Ip</b> | <b><math>\Delta\text{E}(\text{J-T})</math></b> |
|------------------|----------------|------------|-----------------------------------------|-----------|------------------------------------------------|
| <b>cam-B3LYP</b> | -921.56357     | -921.29527 | -921.29892                              | 7.30      | -2.29                                          |
| <b>wB97XD</b>    | -921.76313     | -921.49377 | -921.49739                              | 7.33      | -2.27                                          |
| <b>M062X</b>     | -921.73007     | -921.45419 | -921.45755                              | 7.51      | -2.11                                          |
| <b>B3LYP</b>     | -922.09316     | -921.83266 | -921.83421                              | 7.09      | -0.97                                          |

Table S7. Effects of functionals on the relative energies (in kcal/mol) of ABA, ABC, and full overlap forms of  $(\text{Coro})_3^+$ . Single point energy calculations with the wB97XD, M062X, and B3LYP functionals were performed using the optimized structure obtained at the CAM-B3LYP/6-311G(d,p) level.

|             | <b>cam-B3LYP</b> | <b>wB97XD</b> | <b>M062X</b> | <b>B3LYP</b> |
|-------------|------------------|---------------|--------------|--------------|
| <b>ABA</b>  | 0.00             | 0.73          | 0.43         | 1.24         |
| <b>ABC</b>  | 0.10             | 0.00          | 0.00         | 0.00         |
| <b>full</b> | 2.44             | 14.87         | 17.65        | 0.89         |

Table S8. Scaled hyperfine coupling constants ( $a(\text{H})$  in mT) of  $(\text{Coro})_3^+$  (regular structures), relative energies ( $\Delta\text{E}$  in kcal/mol), and total energies ( $\text{E}(\text{total})$  in a.u.).

| <b>Form</b> | <b>coro(A)</b> | <b>coro(B)</b> | <b>coro(C)</b> | <b><math>\Delta\text{E}</math></b> | <b><math>\text{E}(\text{total})</math></b> |
|-------------|----------------|----------------|----------------|------------------------------------|--------------------------------------------|
| <b>ABA</b>  | -0.11124       | -0.02130       | -0.02132       | 0.00                               | -2764.44724                                |
| <b>ABC</b>  | -0.11101       | -0.02108       | -0.02124       | 0.10                               | -2764.44709                                |
| <b>full</b> | -0.10725       | -0.02491       | -0.02493       | 2.44                               | -2764.44336                                |

## 1. Geometry of ABA

| Number | atom | Type | X         | Y         | Z         |
|--------|------|------|-----------|-----------|-----------|
| 1      | 6    | 0    | 0.000716  | 1.562058  | -3.648463 |
| 2      | 6    | 0    | 0.000831  | 2.286620  | -2.447164 |
| 3      | 6    | 0    | 0.000506  | 1.582020  | -1.224486 |
| 4      | 6    | 0    | 0.000066  | 0.163690  | -1.224735 |
| 5      | 6    | 0    | 0.000011  | -0.541836 | -2.446606 |
| 6      | 6    | 0    | 0.000330  | 0.182247  | -3.648041 |
| 7      | 6    | 0    | 0.000696  | 2.287935  | 0.000484  |
| 8      | 6    | 0    | -0.000258 | -0.543894 | -0.000554 |
| 9      | 6    | 0    | -0.000098 | 0.162806  | 1.224148  |
| 10     | 6    | 0    | 0.000437  | 1.581131  | 1.224935  |
| 11     | 6    | 0    | -0.000362 | -0.543599 | 2.445495  |
| 12     | 6    | 0    | -0.000883 | -1.971367 | 2.415331  |
| 13     | 6    | 0    | -0.001067 | -2.652363 | 1.239359  |
| 14     | 6    | 0    | -0.000742 | -1.964826 | -0.001066 |
| 15     | 6    | 0    | -0.000758 | -2.651479 | -1.242022 |
| 16     | 6    | 0    | -0.000352 | -1.969648 | -2.417475 |
| 17     | 1    | 0    | -0.000270 | -2.505725 | -3.358954 |
| 18     | 1    | 0    | -0.001247 | -3.733932 | -1.237426 |
| 19     | 1    | 0    | 0.000958  | 2.100683  | -4.588968 |
| 20     | 1    | 0    | 0.000272  | -0.356916 | -4.587584 |
| 21     | 1    | 0    | -0.001113 | -2.508136 | 3.356415  |
| 22     | 1    | 0    | -0.001467 | -3.734812 | 1.233989  |
| 23     | 6    | 0    | 0.001309  | 3.715368  | -2.417548 |
| 24     | 6    | 0    | 0.001486  | 4.397690  | -1.240890 |
| 25     | 6    | 0    | 0.001205  | 3.710200  | 0.000997  |
| 26     | 1    | 0    | 0.001543  | 4.252470  | -3.358981 |
| 27     | 1    | 0    | 0.001862  | 5.481102  | -1.236574 |
| 28     | 6    | 0    | 0.001421  | 4.396800  | 1.243419  |
| 29     | 6    | 0    | 0.001176  | 3.713638  | 2.419559  |
| 30     | 6    | 0    | 0.000674  | 2.284842  | 2.448140  |
| 31     | 1    | 0    | 0.001804  | 5.480214  | 1.239877  |

|    |   |   |           |           |           |
|----|---|---|-----------|-----------|-----------|
| 32 | 1 | 0 | 0.001361  | 4.250042  | 3.361388  |
| 33 | 6 | 0 | -0.000103 | 0.179608  | 3.647470  |
| 34 | 1 | 0 | -0.000306 | -0.360246 | 4.586615  |
| 35 | 6 | 0 | 0.000411  | 1.559419  | 3.648901  |
| 36 | 1 | 0 | 0.000603  | 2.097355  | 4.589800  |
| 37 | 6 | 0 | -3.622779 | -3.270300 | -2.423795 |
| 38 | 6 | 0 | -3.625409 | -1.848058 | -2.451695 |
| 39 | 6 | 0 | -3.611701 | -1.144938 | -1.231634 |
| 40 | 6 | 0 | -3.599403 | -1.855917 | -0.000994 |
| 41 | 6 | 0 | -3.598999 | -3.266859 | -0.001926 |
| 42 | 6 | 0 | -3.609345 | -3.952098 | -1.246034 |
| 43 | 6 | 0 | -3.626403 | 0.277179  | -1.230679 |
| 44 | 6 | 0 | -3.611537 | -1.146568 | 1.230587  |
| 45 | 6 | 0 | -3.626314 | 0.275546  | 1.231511  |
| 46 | 6 | 0 | -3.631095 | 0.987194  | 0.000885  |
| 47 | 6 | 0 | -3.653364 | 0.978501  | 2.451234  |
| 48 | 6 | 0 | -3.668555 | 0.244765  | 3.663647  |
| 49 | 6 | 0 | -3.657038 | -1.119913 | 3.662887  |
| 50 | 6 | 0 | -3.624955 | -1.851301 | 2.449725  |
| 51 | 6 | 0 | -3.622151 | -3.273514 | 2.419949  |
| 52 | 6 | 0 | -3.608952 | -3.953744 | 1.241289  |
| 53 | 1 | 0 | -3.620445 | -5.037638 | 1.236444  |
| 54 | 1 | 0 | -3.644677 | -3.812804 | 3.360136  |
| 55 | 1 | 0 | -3.645607 | -3.808347 | -3.364688 |
| 56 | 1 | 0 | -3.620961 | -5.035996 | -1.242623 |
| 57 | 1 | 0 | -3.706157 | 0.788036  | 4.600946  |
| 58 | 1 | 0 | -3.683810 | -1.665166 | 4.599550  |
| 59 | 6 | 0 | -3.657564 | -1.115063 | -3.663890 |
| 60 | 6 | 0 | -3.668901 | 0.249614  | -3.662853 |
| 61 | 6 | 0 | -3.653510 | 0.981744  | -2.449477 |
| 62 | 1 | 0 | -3.684526 | -1.659074 | -4.601268 |
| 63 | 1 | 0 | -3.706533 | 0.794126  | -4.599431 |
| 64 | 6 | 0 | -3.679799 | 2.402823  | -2.419717 |
| 65 | 6 | 0 | -3.682059 | 3.082748  | -1.241126 |
| 66 | 6 | 0 | -3.658816 | 2.396531  | 0.001813  |
| 67 | 1 | 0 | -3.712106 | 2.941262  | -3.360057 |

|     |   |   |           |           |           |
|-----|---|---|-----------|-----------|-----------|
| 68  | 1 | 0 | -3.713417 | 4.166088  | -1.236129 |
| 69  | 6 | 0 | -3.679746 | 2.399610  | 2.423346  |
| 70  | 1 | 0 | -3.712048 | 2.936813  | 3.364394  |
| 71  | 6 | 0 | -3.682061 | 3.081099  | 1.245648  |
| 72  | 1 | 0 | -3.713456 | 4.164443  | 1.242092  |
| 73  | 6 | 0 | 3.605990  | -3.954039 | -1.245325 |
| 74  | 6 | 0 | 3.596342  | -3.268593 | -0.001327 |
| 75  | 6 | 0 | 3.597958  | -1.857649 | -0.000624 |
| 76  | 6 | 0 | 3.610898  | -1.146888 | -1.231382 |
| 77  | 6 | 0 | 3.624023  | -1.850217 | -2.451333 |
| 78  | 6 | 0 | 3.620028  | -3.272454 | -2.423200 |
| 79  | 6 | 0 | 3.610659  | -1.148113 | 1.230841  |
| 80  | 6 | 0 | 3.626816  | 0.275215  | -1.230653 |
| 81  | 6 | 0 | 3.631982  | 0.985427  | 0.000797  |
| 82  | 6 | 0 | 3.626589  | 0.273991  | 1.231539  |
| 83  | 6 | 0 | 3.660814  | 2.394744  | 0.001501  |
| 84  | 6 | 0 | 3.684694  | 3.080739  | -1.241546 |
| 85  | 6 | 0 | 3.682023  | 2.400623  | -2.420028 |
| 86  | 6 | 0 | 3.654604  | 0.979562  | -2.449561 |
| 87  | 6 | 0 | 3.669506  | 0.247222  | -3.662816 |
| 88  | 6 | 0 | 3.656969  | -1.117447 | -3.663639 |
| 89  | 1 | 0 | 3.683545  | -1.661632 | -4.600927 |
| 90  | 1 | 0 | 3.707717  | 0.791553  | -4.599476 |
| 91  | 1 | 0 | 3.616564  | -5.037947 | -1.241738 |
| 92  | 1 | 0 | 3.642297  | -3.810682 | -3.364002 |
| 93  | 1 | 0 | 3.716890  | 4.164055  | -1.236725 |
| 94  | 1 | 0 | 3.714838  | 2.938885  | -3.360452 |
| 95  | 6 | 0 | 3.605771  | -3.955291 | 1.241991  |
| 96  | 6 | 0 | 3.619548  | -3.274881 | 2.420542  |
| 97  | 6 | 0 | 3.623492  | -1.852666 | 2.450089  |
| 98  | 1 | 0 | 3.616371  | -5.039195 | 1.237316  |
| 99  | 1 | 0 | 3.641654  | -3.814036 | 3.360816  |
| 100 | 6 | 0 | 3.656114  | -1.121112 | 3.663135  |
| 101 | 6 | 0 | 3.668700  | 0.243559  | 3.663680  |
| 102 | 6 | 0 | 3.654134  | 0.977116  | 2.451153  |
| 103 | 1 | 0 | 3.682422  | -1.666235 | 4.599886  |

|     |   |   |          |          |          |
|-----|---|---|----------|----------|----------|
| 104 | 1 | 0 | 3.706683 | 0.786949 | 4.600895 |
| 105 | 6 | 0 | 3.684502 | 3.079493 | 1.245229 |
| 106 | 1 | 0 | 3.716726 | 4.162813 | 1.241501 |
| 107 | 6 | 0 | 3.681607 | 2.398201 | 2.423039 |
| 108 | 1 | 0 | 3.714267 | 2.935533 | 3.364000 |

## 2. Geometry of ABC

| Number | Number | Type | X         | Y         | Z         |
|--------|--------|------|-----------|-----------|-----------|
| 1      | 6      | 0    | 0.392477  | 3.650008  | 0.554877  |
| 2      | 6      | 0    | 0.807534  | 2.450837  | 1.153069  |
| 3      | 6      | 0    | 0.404365  | 1.226354  | 0.579242  |
| 4      | 6      | 0    | -0.406316 | 1.221938  | -0.584424 |
| 5      | 6      | 0    | -0.814589 | 2.442108  | -1.164001 |
| 6      | 6      | 0    | -0.404418 | 3.645737  | -0.571562 |
| 7      | 6      | 0    | 0.808286  | 0.003882  | 1.163835  |
| 8      | 6      | 0    | -0.806146 | -0.004875 | -1.162597 |
| 9      | 6      | 0    | -0.402137 | -1.227357 | -0.578045 |
| 10     | 6      | 0    | 0.408498  | -1.222952 | 0.585634  |
| 11     | 6      | 0    | -0.805998 | -2.451822 | -1.151400 |
| 12     | 6      | 0    | -1.626637 | -2.426787 | -2.320475 |
| 13     | 6      | 0    | -2.015804 | -1.252766 | -2.885071 |
| 14     | 6      | 0    | -1.622241 | -0.009301 | -2.326468 |
| 15     | 6      | 0    | -2.020565 | 1.230053  | -2.891214 |
| 16     | 6      | 0    | -1.635469 | 2.408212  | -2.332793 |
| 17     | 1      | 0    | -1.951593 | 3.347970  | -2.769929 |
| 18     | 1      | 0    | -2.650631 | 1.222043  | -3.771914 |
| 19     | 1      | 0    | 0.701780  | 4.591637  | 0.992752  |
| 20     | 1      | 0    | -0.717751 | 4.584016  | -1.013724 |
| 21     | 1      | 0    | -1.939361 | -3.369871 | -2.752882 |
| 22     | 1      | 0    | -2.645373 | -1.251511 | -3.766170 |
| 23     | 6      | 0    | 1.627818  | 2.425810  | 2.322388  |
| 24     | 6      | 0    | 2.017017  | 1.251792  | 2.886942  |
| 25     | 6      | 0    | 1.623690  | 0.008297  | 2.328195  |
| 26     | 1      | 0    | 1.940063  | 3.368890  | 2.755148  |

|    |   |   |           |           |           |
|----|---|---|-----------|-----------|-----------|
| 27 | 1 | 0 | 2.646150  | 1.250555  | 3.768357  |
| 28 | 6 | 0 | 2.021202  | -1.231044 | 2.893519  |
| 29 | 6 | 0 | 1.636284  | -2.409208 | 2.334963  |
| 30 | 6 | 0 | 0.816062  | -2.443103 | 1.165706  |
| 31 | 1 | 0 | 2.650279  | -1.223032 | 3.774937  |
| 32 | 1 | 0 | 1.951863  | -3.348982 | 2.772464  |
| 33 | 6 | 0 | -0.391480 | -3.651003 | -0.552845 |
| 34 | 1 | 0 | -0.701331 | -4.592626 | -0.990345 |
| 35 | 6 | 0 | 0.405355  | -3.646739 | 0.573635  |
| 36 | 1 | 0 | 0.718091  | -4.585026 | 1.016208  |
| 37 | 6 | 0 | -5.343319 | 2.415583  | -1.374514 |
| 38 | 6 | 0 | -4.540444 | 2.447827  | -0.200561 |
| 39 | 6 | 0 | -4.127234 | 1.229805  | 0.373061  |
| 40 | 6 | 0 | -4.517108 | -0.003061 | -0.217254 |
| 41 | 6 | 0 | -5.315595 | -0.006365 | -1.380518 |
| 42 | 6 | 0 | -5.714856 | 1.235762  | -1.942188 |
| 43 | 6 | 0 | -3.332609 | 1.233077  | 1.552520  |
| 44 | 6 | 0 | -4.123439 | -1.232638 | 0.377447  |
| 45 | 6 | 0 | -3.328784 | -1.229263 | 1.556880  |
| 46 | 6 | 0 | -2.930427 | 0.003566  | 2.142143  |
| 47 | 6 | 0 | -2.950482 | -2.446841 | 2.154425  |
| 48 | 6 | 0 | -3.379130 | -3.661507 | 1.563060  |
| 49 | 6 | 0 | -4.144246 | -3.664947 | 0.433065  |
| 50 | 6 | 0 | -4.532961 | -2.453950 | -0.191764 |
| 51 | 6 | 0 | -5.335907 | -2.428352 | -1.365811 |
| 52 | 6 | 0 | -5.711013 | -1.251695 | -1.937732 |
| 53 | 1 | 0 | -6.334516 | -1.250124 | -2.824438 |
| 54 | 1 | 0 | -5.659192 | -3.370132 | -1.794563 |
| 55 | 1 | 0 | -5.669464 | 3.354841  | -1.806618 |
| 56 | 1 | 0 | -6.338396 | 1.229113  | -2.828841 |
| 57 | 1 | 0 | -3.101189 | -4.597037 | 2.034888  |
| 58 | 1 | 0 | -4.475490 | -4.603198 | 0.002567  |
| 59 | 6 | 0 | -4.155359 | 3.662208  | 0.419879  |
| 60 | 6 | 0 | -3.390320 | 3.665139  | 1.549957  |
| 61 | 6 | 0 | -2.958100 | 2.453922  | 2.145761  |
| 62 | 1 | 0 | -4.489366 | 4.597917  | -0.013999 |

|    |   |   |           |           |           |
|----|---|---|-----------|-----------|-----------|
| 63 | 1 | 0 | -3.115206 | 4.603207  | 2.018397  |
| 64 | 6 | 0 | -2.171488 | 2.428415  | 3.329631  |
| 65 | 6 | 0 | -1.783434 | 1.251825  | 3.892160  |
| 66 | 6 | 0 | -2.152165 | 0.006848  | 3.317222  |
| 67 | 1 | 0 | -1.893449 | 3.370308  | 3.788573  |
| 68 | 1 | 0 | -1.191985 | 1.249921  | 4.800313  |
| 69 | 6 | 0 | -2.163922 | -2.414707 | 3.338167  |
| 70 | 1 | 0 | -1.882980 | -3.354108 | 3.800433  |
| 71 | 6 | 0 | -1.779543 | -1.234942 | 3.896541  |
| 72 | 1 | 0 | -1.188100 | -1.227979 | 4.804671  |
| 73 | 6 | 0 | 1.778227  | 1.229115  | -3.899700 |
| 74 | 6 | 0 | 2.151804  | -0.011442 | -3.318309 |
| 75 | 6 | 0 | 2.930042  | -0.005605 | -2.143209 |
| 76 | 6 | 0 | 3.327494  | 1.228476  | -1.560052 |
| 77 | 6 | 0 | 2.948443  | 2.444783  | -2.159731 |
| 78 | 6 | 0 | 2.161895  | 2.410086  | -3.343437 |
| 79 | 6 | 0 | 3.332813  | -1.233819 | -1.551322 |
| 80 | 6 | 0 | 4.122042  | 1.234413  | -0.380547 |
| 81 | 6 | 0 | 4.516360  | 0.006149  | 0.216366  |
| 82 | 6 | 0 | 4.127268  | -1.227995 | -0.371769 |
| 83 | 6 | 0 | 5.314772  | 0.011972  | 1.379709  |
| 84 | 6 | 0 | 5.709511  | 1.258472  | 1.934669  |
| 85 | 6 | 0 | 5.333729  | 2.433911  | 1.360628  |
| 86 | 6 | 0 | 4.530806  | 2.456965  | 0.186527  |
| 87 | 6 | 0 | 4.141336  | 3.666612  | -0.440415 |
| 88 | 6 | 0 | 3.376233  | 3.660722  | -1.570437 |
| 89 | 1 | 0 | 3.097638  | 4.595259  | -2.043841 |
| 90 | 1 | 0 | 4.471911  | 4.605829  | -0.011517 |
| 91 | 1 | 0 | 1.186718  | 1.220174  | -4.807769 |
| 92 | 1 | 0 | 1.880272  | 3.348497  | -3.807290 |
| 93 | 1 | 0 | 6.332978  | 1.258863  | 2.821399  |
| 94 | 1 | 0 | 5.656513  | 3.376631  | 1.787685  |
| 95 | 6 | 0 | 1.783938  | -1.257627 | -3.891117 |
| 96 | 6 | 0 | 2.172609  | -2.432996 | -3.326429 |
| 97 | 6 | 0 | 2.959039  | -2.455934 | -2.142392 |
| 98 | 1 | 0 | 1.192627  | -1.257696 | -4.799360 |



|     |   |   |          |           |           |
|-----|---|---|----------|-----------|-----------|
| 99  | 1 | 0 | 1.895177 | -3.375863 | -3.783734 |
| 100 | 6 | 0 | 3.391783 | -3.665842 | -1.544321 |
| 101 | 6 | 0 | 4.156656 | -3.660459 | -0.414123 |
| 102 | 6 | 0 | 4.540999 | -2.444766 | 0.204143  |
| 103 | 1 | 0 | 3.117217 | -4.604894 | -2.011103 |
| 104 | 1 | 0 | 4.491081 | -4.595196 | 0.021522  |
| 105 | 6 | 0 | 5.714635 | -1.228955 | 1.943670  |
| 106 | 1 | 0 | 6.338050 | -1.220349 | 2.830394  |
| 107 | 6 | 0 | 5.343764 | -2.409978 | 1.378137  |
| 108 | 1 | 0 | 5.670330 | -3.348282 | 1.811987  |

### 3. Geometry of full overlap

| Number | Number | Type | X         | Y         | Z         |
|--------|--------|------|-----------|-----------|-----------|
| 1      | 6      | 0    | 0.000163  | -0.705716 | -1.224919 |
| 2      | 6      | 0    | 0.000041  | 0.712908  | -1.224920 |
| 3      | 6      | 0    | -0.000001 | 1.420029  | -0.000001 |
| 4      | 6      | 0    | 0.000041  | 0.712908  | 1.224919  |
| 5      | 6      | 0    | 0.000163  | -0.705716 | 1.224920  |
| 6      | 6      | 0    | 0.000253  | -1.412842 | 0.000000  |
| 7      | 6      | 0    | 0.000085  | -0.685784 | -3.648993 |
| 8      | 6      | 0    | -0.000058 | 0.693003  | -3.648994 |
| 9      | 6      | 0    | -0.000089 | 1.418116  | -2.447157 |
| 10     | 6      | 0    | -0.000246 | 2.845812  | -2.418113 |
| 11     | 6      | 0    | -0.000292 | 3.527192  | -1.241629 |
| 12     | 6      | 0    | -0.000190 | 2.840508  | -0.000001 |
| 13     | 6      | 0    | -0.000292 | 3.527193  | 1.241627  |
| 14     | 6      | 0    | -0.000246 | 2.845813  | 2.418112  |
| 15     | 6      | 0    | -0.000089 | 1.418117  | 2.447156  |
| 16     | 6      | 0    | -0.000058 | 0.693005  | 3.648994  |
| 17     | 6      | 0    | 0.000085  | -0.685782 | 3.648994  |
| 18     | 6      | 0    | 0.000191  | -1.410901 | 2.447160  |
| 19     | 6      | 0    | 0.000309  | -2.838596 | 2.418113  |
| 20     | 6      | 0    | 0.000384  | -3.519976 | 1.241633  |
| 21     | 6      | 0    | 0.000345  | -2.833307 | 0.000001  |

|    |   |   |           |           |           |
|----|---|---|-----------|-----------|-----------|
| 22 | 6 | 0 | 0.000384  | -3.519977 | -1.241632 |
| 23 | 6 | 0 | 0.000309  | -2.838597 | -2.418112 |
| 24 | 6 | 0 | 0.000191  | -1.410903 | -2.447159 |
| 25 | 1 | 0 | 0.000105  | -1.224346 | -4.589232 |
| 26 | 1 | 0 | -0.000155 | 1.231570  | -4.589233 |
| 27 | 1 | 0 | -0.000344 | 3.382575  | -3.359461 |
| 28 | 1 | 0 | -0.000427 | 4.610323  | -1.236910 |
| 29 | 1 | 0 | -0.000427 | 4.610324  | 1.236907  |
| 30 | 1 | 0 | -0.000344 | 3.382577  | 3.359459  |
| 31 | 1 | 0 | -0.000155 | 1.231572  | 4.589232  |
| 32 | 1 | 0 | 0.000105  | -1.224344 | 4.589232  |
| 33 | 1 | 0 | 0.000332  | -3.375353 | 3.359462  |
| 34 | 1 | 0 | 0.000464  | -4.603104 | 1.236919  |
| 35 | 1 | 0 | 0.000464  | -4.603105 | -1.236917 |
| 36 | 1 | 0 | 0.000332  | -3.375355 | -3.359461 |
| 37 | 6 | 0 | -3.898401 | -0.713075 | -1.230807 |
| 38 | 6 | 0 | -3.898933 | 0.709192  | -1.230808 |
| 39 | 6 | 0 | -3.901393 | 1.419841  | 0.000000  |
| 40 | 6 | 0 | -3.898933 | 0.709192  | 1.230808  |
| 41 | 6 | 0 | -3.898401 | -0.713075 | 1.230808  |
| 42 | 6 | 0 | -3.900243 | -1.423721 | 0.000000  |
| 43 | 6 | 0 | -3.919902 | -0.684556 | -3.662881 |
| 44 | 6 | 0 | -3.920415 | 0.680628  | -3.662883 |
| 45 | 6 | 0 | -3.912688 | 1.413287  | -2.450417 |
| 46 | 6 | 0 | -3.933752 | 2.835077  | -2.421797 |
| 47 | 6 | 0 | -3.940637 | 3.515732  | -1.243526 |
| 48 | 6 | 0 | -3.922276 | 2.830219  | -0.000001 |
| 49 | 6 | 0 | -3.940637 | 3.515733  | 1.243525  |
| 50 | 6 | 0 | -3.933752 | 2.835079  | 2.421795  |
| 51 | 6 | 0 | -3.912688 | 1.413289  | 2.450417  |
| 52 | 6 | 0 | -3.920415 | 0.680630  | 3.662882  |
| 53 | 6 | 0 | -3.919902 | -0.684555 | 3.662881  |
| 54 | 6 | 0 | -3.911596 | -1.417195 | 2.450414  |
| 55 | 6 | 0 | -3.931570 | -2.839006 | 2.421789  |
| 56 | 6 | 0 | -3.937896 | -3.519663 | 1.243520  |
| 57 | 6 | 0 | -3.920015 | -2.834129 | 0.000001  |

|    |   |   |           |           |           |
|----|---|---|-----------|-----------|-----------|
| 58 | 6 | 0 | -3.937896 | -3.519664 | -1.243518 |
| 59 | 6 | 0 | -3.931570 | -2.839007 | -2.421787 |
| 60 | 6 | 0 | -3.911596 | -1.417197 | -2.450413 |
| 61 | 1 | 0 | -3.941304 | -1.228415 | -4.600409 |
| 62 | 1 | 0 | -3.942228 | 1.224466  | -4.600413 |
| 63 | 1 | 0 | -3.958803 | 3.373124  | -3.362579 |
| 64 | 1 | 0 | -3.969492 | 4.599261  | -1.239285 |
| 65 | 1 | 0 | -3.969492 | 4.599261  | 1.239283  |
| 66 | 1 | 0 | -3.958803 | 3.373126  | 3.362577  |
| 67 | 1 | 0 | -3.942228 | 1.224468  | 4.600413  |
| 68 | 1 | 0 | -3.941304 | -1.228413 | 4.600410  |
| 69 | 1 | 0 | -3.956246 | -3.377073 | 3.362570  |
| 70 | 1 | 0 | -3.965927 | -4.603214 | 1.239274  |
| 71 | 1 | 0 | -3.965927 | -4.603214 | -1.239271 |
| 72 | 1 | 0 | -3.956246 | -3.377075 | -3.362568 |
| 73 | 6 | 0 | 3.898494  | -0.712766 | -1.230802 |
| 74 | 6 | 0 | 3.898864  | 0.709497  | -1.230803 |
| 75 | 6 | 0 | 3.901241  | 1.420146  | 0.000000  |
| 76 | 6 | 0 | 3.898864  | 0.709497  | 1.230803  |
| 77 | 6 | 0 | 3.898494  | -0.712765 | 1.230803  |
| 78 | 6 | 0 | 3.900451  | -1.423413 | 0.000000  |
| 79 | 6 | 0 | 3.919883  | -0.684251 | -3.662875 |
| 80 | 6 | 0 | 3.920215  | 0.680941  | -3.662876 |
| 81 | 6 | 0 | 3.912445  | 1.413595  | -2.450417 |
| 82 | 6 | 0 | 3.933291  | 2.835390  | -2.421796 |
| 83 | 6 | 0 | 3.940102  | 3.516047  | -1.243526 |
| 84 | 6 | 0 | 3.921874  | 2.830531  | -0.000001 |
| 85 | 6 | 0 | 3.940102  | 3.516047  | 1.243525  |
| 86 | 6 | 0 | 3.933291  | 2.835392  | 2.421794  |
| 87 | 6 | 0 | 3.912445  | 1.413597  | 2.450417  |
| 88 | 6 | 0 | 3.920215  | 0.680943  | 3.662876  |
| 89 | 6 | 0 | 3.919883  | -0.684249 | 3.662875  |
| 90 | 6 | 0 | 3.911724  | -1.416886 | 2.450414  |
| 91 | 6 | 0 | 3.931876  | -2.838696 | 2.421788  |
| 92 | 6 | 0 | 3.938318  | -3.519353 | 1.243519  |
| 93 | 6 | 0 | 3.920375  | -2.833822 | 0.000001  |

|     |   |   |          |           |           |
|-----|---|---|----------|-----------|-----------|
| 94  | 6 | 0 | 3.938318 | -3.519354 | -1.243517 |
| 95  | 6 | 0 | 3.931876 | -2.838697 | -2.421786 |
| 96  | 6 | 0 | 3.911724 | -1.416887 | -2.450413 |
| 97  | 1 | 0 | 3.941313 | -1.228099 | -4.600408 |
| 98  | 1 | 0 | 3.941906 | 1.224774  | -4.600412 |
| 99  | 1 | 0 | 3.958224 | 3.373440  | -3.362579 |
| 100 | 1 | 0 | 3.968777 | 4.599580  | -1.239287 |
| 101 | 1 | 0 | 3.968777 | 4.599580  | 1.239284  |
| 102 | 1 | 0 | 3.958224 | 3.373442  | 3.362577  |
| 103 | 1 | 0 | 3.941906 | 1.224777  | 4.600411  |
| 104 | 1 | 0 | 3.941313 | -1.228097 | 4.600409  |
| 105 | 1 | 0 | 3.956588 | -3.376759 | 3.362570  |
| 106 | 1 | 0 | 3.966477 | -4.602900 | 1.239275  |
| 107 | 1 | 0 | 3.966477 | -4.602901 | -1.239273 |
| 108 | 1 | 0 | 3.956588 | -3.376761 | -3.362568 |

4. Harmonic vibrational frequency (in  $\text{cm}^{-1}$ ) of  $\text{Coro}^+$  at the  ${}^2A_u$  state calculated at the CAM-B3LYP/6-311G(d,p) level.

|          |          |          |          |          |          |
|----------|----------|----------|----------|----------|----------|
| 102      | 101      | 100      | 99       | 98       | 97       |
| AG       | B2U      | B1U      | AG       | B3G      | B2U      |
| 3220.532 | 3220.343 | 3218.445 | 3217.93  | 3217.633 | 3217.265 |
| 96       | 95       | 94       | 93       | 92       | 91       |
| B1U      | B3G      | AG       | B1U      | B2U      | B3G      |
| 3205.533 | 3205.017 | 3204.797 | 3203.874 | 3203.135 | 3202.694 |
| 90       | 89       | 88       | 87       | 86       | 85       |
| AG       | B2U      | AG       | B1U      | B3G      | B1U      |
| 1718.473 | 1667.632 | 1650.459 | 1637.635 | 1601.473 | 1597.099 |
| 84       | 83       | 82       | 81       | 80       | 79       |
| B2U      | B3G      | B1U      | AG       | B2U      | AG       |
| 1580.729 | 1568.385 | 1533.51  | 1530.787 | 1524.144 | 1520.104 |
| 78       | 77       | 76       | 75       | 74       | 73       |
| B3G      | B1U      | AG       | B3G      | B2U      | B2U      |

|          |          |          |          |          |          |
|----------|----------|----------|----------|----------|----------|
| 1479.733 | 1459.808 | 1457.378 | 1456.266 | 1440.076 | 1404.944 |
| 72       | 71       | 70       | 69       | 68       | 67       |
| AG       | B1U      | B1U      | B2U      | B3G      | AG       |
| 1404.075 | 1397.655 | 1360.398 | 1354.633 | 1342.21  | 1283.268 |
| 66       | 65       | 64       | 63       | 62       | 61       |
| B3G      | B2U      | AG       | B1U      | B2U      | B3G      |
| 1271.467 | 1258.828 | 1255.111 | 1249.76  | 1237.781 | 1209.797 |
| 60       | 59       | 58       | 57       | 56       | 55       |
| AG       | B1U      | B2U      | B2U      | B1U      | AG       |
| 1199.117 | 1197.556 | 1178.543 | 1166.842 | 1165.258 | 1072.197 |
| 54       | 53       | 52       | 51       | 50       | 49       |
| B3G      | B2G      | AU       | AG       | B3U      | B2G      |
| 1037.114 | 1031.861 | 1029.171 | 1026.858 | 1022.339 | 1017.081 |
| 48       | 47       | 46       | 45       | 44       | 43       |
| B1G      | AU       | B3G      | B3U      | B2G      | B1G      |
| 1009.509 | 1004.074 | 951.698  | 910.9592 | 891.9427 | 886.4415 |
| 42       | 41       | 40       | 39       | 38       | 37       |
| AU       | B1U      | B3U      | B2U      | B1G      | B1U      |
| 851.1703 | 841.3075 | 832.0702 | 813.5258 | 805.6066 | 785.8767 |
| 36       | 35       | 34       | 33       | 32       | 31       |
| B2U      | AU       | B3U      | B3G      | B2G      | AG       |
| 780.0052 | 774.4076 | 758.061  | 747.7511 | 711.7529 | 694.7491 |
| 30       | 29       | 28       | 27       | 26       | 25       |
| B1U      | B3G      | B1G      | B2G      | B3G      | B2G      |
| 683.4067 | 681.8647 | 675.3881 | 673.3925 | 644.5558 | 587.3786 |
| 24       | 23       | 22       | 21       | 20       | 19       |
| B3U      | B1U      | AU       | B3U      | AU       | AG       |
| 575.0503 | 566.4083 | 561.2933 | 533.5966 | 509.3985 | 502.1834 |
| 18       | 17       | 16       | 15       | 14       | 13       |
| AG       | B3G      | B2U      | B1G      | B2G      | B2U      |
| 493.9482 | 480.3549 | 469.8108 | 450.8933 | 443.3776 | 388.4935 |
| 12       | 11       | 10       | 9        | 8        | 7        |
| B1U      | AG       | B1G      | AU       | B3U      | B2G      |
| 384.6571 | 374.9324 | 302.8381 | 301.4874 | 296.9332 | 284.0111 |
| 6        | 5        | 4        | 3        | 2        | 1        |
| B2G      | B1G      | B3G      | B3U      | AU       | B3U      |

222.7102 161.7655 142.9997 123.938 90.5171 85.5568

5. Harmonic vibrational frequency (in  $\text{cm}^{-1}$ ) of  $\text{Coro}^+$  at the  ${}^2\text{B}_{3u}$  state calculated at the CAM-B3LYP/6-311G(d,p) level.

|     |          |          |          |          |          |          |
|-----|----------|----------|----------|----------|----------|----------|
|     | 102      | 101      | 100      | 99       | 98       | 97       |
| AG  | B1U      | B2U      | B3G      | AG       | B2U      |          |
|     | 3220.566 | 3220.346 | 3219.009 | 3218.859 | 3216.572 | 3216.409 |
|     | 96       | 95       | 94       | 93       | 92       | 91       |
| B1U | AG       | B3G      | B2U      | B1U      | B3G      |          |
|     | 3205.446 | 3204.947 | 3204.815 | 3203.967 | 3202.844 | 3202.498 |
|     | 90       | 89       | 88       | 87       | 86       | 85       |
| AG  | B1U      | AG       | B2U      | B1U      | B3G      |          |
|     | 1695.483 | 1664.297 | 1648.231 | 1632.536 | 1611.49  | 1604.772 |
|     | 84       | 83       | 82       | 81       | 80       | 79       |
| B3G | B2U      | B1U      | B3G      | B2U      | AG       |          |
|     | 1587.74  | 1554.958 | 1550.71  | 1521.197 | 1517.971 | 1504.94  |
|     | 78       | 77       | 76       | 75       | 74       | 73       |
| AG  | B3G      | B1U      | AG       | B1U      | B2U      |          |
|     | 1477.022 | 1464.914 | 1462.22  | 1450.684 | 1443.702 | 1409.649 |
|     | 72       | 71       | 70       | 69       | 68       | 67       |
| AG  | B2U      | B2U      | B3G      | B1U      | AG       |          |
|     | 1404.321 | 1396.225 | 1364.611 | 1356.139 | 1351.999 | 1282.702 |
|     | 66       | 65       | 64       | 63       | 62       | 61       |
| B3G | B1U      | AG       | B2U      | B2U      | B3G      |          |
|     | 1271.705 | 1259.694 | 1252.549 | 1250.402 | 1233.163 | 1221.651 |
|     | 60       | 59       | 58       | 57       | 56       | 55       |
| B1U | AG       | B1U      | B2U      | B2U      | AG       |          |
|     | 1197.868 | 1186.1   | 1178.013 | 1172.59  | 1160.002 | 1072.071 |
|     | 54       | 53       | 52       | 51       | 50       | 49       |
| B3G | B2G      | B3U      | AU       | AG       | B1G      |          |
|     | 1045.512 | 1031.15  | 1026.632 | 1024.469 | 1019.113 | 1016.609 |
|     | 48       | 47       | 46       | 45       | 44       | 43       |
| B2G | AU       | B3G      | B3U      | B1G      | B2G      |          |

|          |          |          |          |          |          |
|----------|----------|----------|----------|----------|----------|
| 1011.28  | 1005.077 | 951.5347 | 911.4998 | 893.9711 | 884.5146 |
| 42       | 41       | 40       | 39       | 38       | 37       |
| B3U      | B2U      | AU       | B1U      | B1G      | B2U      |
| 849.3861 | 840.6476 | 833.4122 | 813.8101 | 805.6619 | 785.0379 |
| 36       | 35       | 34       | 33       | 32       | 31       |
| B1U      | B3U      | AU       | B3G      | B2G      | AG       |
| 781.2322 | 773.3202 | 759.6083 | 726.8092 | 711.7898 | 695.312  |
| 30       | 29       | 28       | 27       | 26       | 25       |
| B1U      | B2G      | B1G      | B3G      | B3G      | B2G      |
| 683.2118 | 678.3546 | 670.7837 | 645.3329 | 640.3599 | 587.0483 |
| 24       | 23       | 22       | 21       | 20       | 19       |
| B3U      | B1U      | B3U      | AU       | AU       | AG       |
| 575.9968 | 566.4135 | 558.5582 | 536.5529 | 507.8517 | 502.9048 |
| 18       | 17       | 16       | 15       | 14       | 13       |
| AG       | B3G      | B2U      | B2G      | B1G      | B1U      |
| 493.8505 | 478.5496 | 469.9093 | 450.8497 | 442.8187 | 388.283  |
| 12       | 11       | 10       | 9        | 8        | 7        |
| B2U      | AG       | B2G      | B3U      | AU       | B1G      |
| 385.1019 | 375.7207 | 302.3938 | 301.6468 | 296.4206 | 284.5979 |
| 6        | 5        | 4        | 3        | 2        | 1        |
| B2G      | B1G      | B3U      | B3U      | AU       | B3G      |
| 222.4613 | 161.8966 | 124.008  | 90.5462  | 85.6181  | -157.08  |
